# Supplementary material
Source: publisher site journal article supplement (https://www.spandidos-publications.com/7428/downloadSupplementary)

Figure S1. Effect of xylitol on MDA levels in THP-1 cells. MDA levels were measured using the thiobarbituric acid assay. No significant changes in MDA levels were observed in the presence of high concentrations of xylitol, indicating minimal interference. \*P<0.05 vs. LDL group. MDA, malondialdehyde; LDL, low-density lipoprotein; prot, protein.

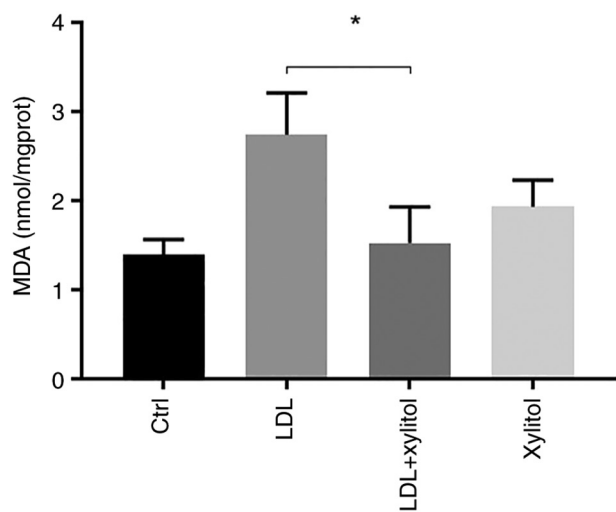

Supplement: Supplementary file 1 [file downloadSupplementary]
